# Supplementary material
Source: PubMed Central journal article supplement (PMC3837903)
Supplement: AAC.00905-13_zac012132422so1.pdf [file AAC.00905-13_zac012132422so1.pdf]

**SUPPLEMENTAL DATA**

**for**

**Functional Role of Methylation of G518 of the 16S rRNA 530 loop by GidB in**

***Mycobacterium tuberculosis***

**SUPPLEMENTARY TABLE 1**

*In silico* digestion of 16S rRNA found no other fragments with the same digested mass as the region of interest.

| <b>RNA position</b> | <b>Mass of oligo with 3' phosphate</b> | <b>Sequence of digestion product</b> |
|---------------------|----------------------------------------|--------------------------------------|
| U1:5                | 1667.123                               | pUUUUGp                              |
| U6:G9               | 1281.132                               | UUUGp                                |
| G10:G10             | 363.057                                | Gp                                   |
| A11:G12             | 692.109                                | AGp                                  |
| A13:G14             | 692.109                                | AGp                                  |
| U15:G18             | 1281.132                               | UUUGp                                |
| A19:G24             | 1914.241                               | AUCCUGp                              |
| G25:G25             | 363.057                                | Gp                                   |
| C26:G30             | 1608.216                               | CUCAGp                               |
| G31:G31             | 363.057                                | Gp                                   |
| A32:G34             | 997.15                                 | ACGp                                 |
| A35:G38             | 1326.202                               | AACGp                                |
| C39:G41             | 974.123                                | CUGp                                 |
| G42:G42             | 363.057                                | Gp                                   |
| C43:G44             | 668.098                                | CGp                                  |
| G45:G45             | 363.057                                | Gp                                   |
| C46:G47             | 668.098                                | CGp                                  |
| U48:G49             | 669.082                                | UGp                                  |
| C50:G60             | 3512.464                               | CUUAACACAUGp                         |

|           |          |           |
|-----------|----------|-----------|
| C61:G64   | 1326.202 | CAAGp     |
| U65:G67   | 974.123  | UCGp      |
| A68:G71   | 1326.202 | AACGp     |
| G72:G72   | 363.057  | Gp        |
| A73:G76   | 1350.214 | AAAGp     |
| G77:G77   | 363.057  | Gp        |
| U78:G85   | 2502.28  | UCUCUUCGp |
| G86:G86   | 363.057  | Gp        |
| A87:G88   | 692.109  | AGp       |
| A89:G95   | 2243.293 | AUACUCGp  |
| A96:G97   | 692.109  | AGp       |
| U98:G99   | 669.082  | UGp       |
| G100:G100 | 363.057  | Gp        |
| C101:G102 | 668.098  | CGp       |
| A103:G106 | 1326.202 | AACGp     |
| G107:G107 | 363.057  | Gp        |
| G108:G108 | 363.057  | Gp        |
| U109:G110 | 669.082  | UGp       |
| A111:G112 | 692.109  | AGp       |
| U113:G119 | 2266.321 | UAACACGp  |
| U120:G121 | 669.082  | UGp       |
| G122:G122 | 363.057  | Gp        |
| G123:G123 | 363.057  | Gp        |
| U124:G125 | 669.082  | UGp       |

|           |          |             |
|-----------|----------|-------------|
| A126:G130 | 1609.2   | AUCUGp      |
| C131:G135 | 1584.205 | CCCUGp      |
| C136:G142 | 2219.282 | CACUUCGp    |
| G143:G143 | 363.057  | Gp          |
| G144:G144 | 363.057  | Gp          |
| A145:G149 | 1656.239 | AUAAGp      |
| C150:G153 | 1279.164 | CCUGp       |
| G154:G154 | 363.057  | Gp          |
| G155:G155 | 363.057  | Gp          |
| A156:G161 | 1961.28  | AAACUGp     |
| G162:G162 | 363.057  | Gp          |
| G163:G163 | 363.057  | Gp          |
| U164:G173 | 3183.412 | UCUAAUACCGp |
| G174:G174 | 363.057  | Gp          |
| A175:G178 | 1327.186 | AUAGp       |
| G179:G179 | 363.057  | Gp          |
| A180:G185 | 1936.284 | ACCACGp     |
| G186:G186 | 363.057  | Gp          |
| G187:G187 | 363.057  | Gp          |
| A188:G190 | 998.134  | AUGp        |
| C191:G194 | 1303.175 | CAUGp       |
| U195:G199 | 1586.173 | UCUUGp      |
| U200:G201 | 669.082  | UGp         |
| G202:G202 | 363.057  | Gp          |

|           |          |           |
|-----------|----------|-----------|
| U203:G204 | 669.082  | UGp       |
| G205:G205 | 363.057  | Gp        |
| A206:G209 | 1350.214 | AAAGp     |
| C210:G211 | 668.098  | CGp       |
| C212:G217 | 1915.225 | CUUUAGp   |
| C218:G219 | 668.098  | CGp       |
| G220:G220 | 363.057  | Gp        |
| U221:G222 | 669.082  | UGp       |
| U223:G224 | 669.082  | UGp       |
| G225:G225 | 363.057  | Gp        |
| G226:G226 | 363.057  | Gp        |
| A227:G229 | 998.134  | AUGp      |
| A230:G231 | 692.109  | AGp       |
| C232:G235 | 1278.18  | CCCGp     |
| C236:G237 | 668.098  | CGp       |
| G238:G238 | 363.057  | Gp        |
| C239:G246 | 2548.334 | CCUAUCAGp |
| C247:G250 | 1280.148 | CUUGp     |
| U251:G253 | 975.107  | UUGp      |
| G254:G254 | 363.057  | Gp        |
| U255:G256 | 669.082  | UGp       |
| G257:G257 | 363.057  | Gp        |
| G258:G258 | 363.057  | Gp        |
| G259:G259 | 363.057  | Gp        |

|           |          |            |
|-----------|----------|------------|
| U260:G261 | 669.082  | UGp        |
| A262:G264 | 997.15   | ACGp       |
| G265:G265 | 363.057  | Gp         |
| C266:G274 | 2876.403 | CCUACCAAGp |
| G275:G275 | 363.057  | Gp         |
| C276:G277 | 668.098  | CGp        |
| A278:G280 | 997.15   | ACGp       |
| A281:G283 | 997.15   | ACGp       |
| G284:G284 | 363.057  | Gp         |
| G285:G285 | 363.057  | Gp         |
| U286:G288 | 998.134  | UAGp       |
| C289:G291 | 973.139  | CCGp       |
| G292:G292 | 363.057  | Gp         |
| C293:G296 | 1279.164 | CCUGp      |
| A297:G298 | 692.109  | AGp        |
| A299:G300 | 692.109  | AGp        |
| G301:G301 | 363.057  | Gp         |
| G302:G302 | 363.057  | Gp         |
| U303:G304 | 669.082  | UGp        |
| U305:G308 | 1279.164 | UCCGp      |
| G309:G309 | 363.057  | Gp         |
| C310:G317 | 2547.35  | CCACACUGp  |
| G318:G318 | 363.057  | Gp         |
| G319:G319 | 363.057  | Gp         |

|           |          |            |
|-----------|----------|------------|
| A320:G323 | 1303.175 | ACUGp      |
| A324:G325 | 692.109  | AGp        |
| A326:G330 | 1632.227 | AUACGp     |
| G331:G331 | 363.057  | Gp         |
| C332:G336 | 1607.232 | CCCAGp     |
| A337:G345 | 2853.375 | ACUCCUACGp |
| G346:G346 | 363.057  | Gp         |
| G347:G347 | 363.057  | Gp         |
| A348:G349 | 692.109  | AGp        |
| G350:G350 | 363.057  | Gp         |
| C351:G353 | 997.15   | CAGp       |
| C354:G356 | 997.15   | CAGp       |
| U357:G358 | 669.082  | UGp        |
| G359:G359 | 363.057  | Gp         |
| G360:G360 | 363.057  | Gp         |
| G361:G361 | 363.057  | Gp         |
| A362:G368 | 2268.289 | AAUAUUGp   |
| C369:G375 | 2266.321 | CACAAUGp   |
| G376:G376 | 363.057  | Gp         |
| G377:G377 | 363.057  | Gp         |
| C378:G379 | 668.098  | CGp        |
| C380:G383 | 1326.202 | CAAGp      |
| C384:G387 | 1279.164 | CCUGp      |
| A388:G390 | 998.134  | AUGp       |

|           |          |                          |
|-----------|----------|--------------------------|
| C391:G393 | 997.15   | CAGp                     |
| C394:G395 | 668.098  | CGp                      |
| A396:G398 | 997.15   | ACGp                     |
| C399:G401 | 973.139  | CCGp                     |
| C402:G403 | 668.098  | CGp                      |
| U404:G405 | 669.082  | UGp                      |
| G406:G406 | 363.057  | Gp                       |
| G407:G407 | 363.057  | Gp                       |
| G408:G408 | 363.057  | Gp                       |
| G409:G409 | 363.057  | Gp                       |
| A410:G412 | 998.134  | AUGp                     |
| A413:G415 | 997.15   | ACGp                     |
| G416:G416 | 363.057  | Gp                       |
| C417:G422 | 1890.23  | CCUUCGp                  |
| G423:G423 | 363.057  | Gp                       |
| G424:G424 | 363.057  | Gp                       |
| U425:G427 | 975.107  | UUGp                     |
| U428:G446 | 5979.755 | UAAACCUCUUUCACCAUCG<br>p |
| A447:G449 | 997.15   | ACGp                     |
| A450:G452 | 1021.161 | AAGp                     |
| G453:G453 | 363.057  | Gp                       |
| U454:G457 | 1279.164 | UCCGp                    |
| G458:G458 | 363.057  | Gp                       |



|           |          |            |
|-----------|----------|------------|
| G459:G459 | 363.057  | Gp         |
| U460:G467 | 2502.28  | UUCUCUCGp  |
| G468:G468 | 363.057  | Gp         |
| A469:G472 | 1304.159 | AUUGp      |
| A473:G475 | 997.15   | ACGp       |
| G476:G476 | 363.057  | Gp         |
| U477:G479 | 998.134  | UAGp       |
| G480:G480 | 363.057  | Gp         |
| U481:G482 | 669.082  | UGp        |
| G483:G483 | 363.057  | Gp         |
| A484:G485 | 692.109  | AGp        |
| A486:G488 | 1021.161 | AAGp       |
| A489:G491 | 1021.161 | AAGp       |
| C492:G496 | 1607.232 | CACCGp     |
| G497:G497 | 363.057  | Gp         |
| C498:G506 | 2876.403 | CCAACUACGp |
| U507:G508 | 669.082  | UGp        |
| C509:G512 | 1302.191 | CCAGp      |
| C513:G515 | 997.15   | CAGp       |
| C516:G518 | 973.139  | CCGp       |
| C519:G520 | 668.098  | CGp        |
| G521:G521 | 363.057  | Gp         |
| U522:G528 | 2267.305 | UAAUACGp   |
| U529:G531 | 998.134  | UAGp       |

|           |          |           |
|-----------|----------|-----------|
| G532:G532 | 363.057  | Gp        |
| G533:G533 | 363.057  | Gp        |
| U534:G535 | 669.082  | UGp       |
| C536:G537 | 668.098  | CGp       |
| A538:G539 | 692.109  | AGp       |
| C540:G541 | 668.098  | CGp       |
| U542:G544 | 975.107  | UUGp      |
| U545:G548 | 1279.164 | UCCGp     |
| G549:G549 | 363.057  | Gp        |
| A550:G557 | 2573.33  | AAUUACUGp |
| G558:G558 | 363.057  | Gp        |
| G559:G559 | 363.057  | Gp        |
| C560:G561 | 668.098  | CGp       |
| U562:G566 | 1656.239 | UAAAGp    |
| A567:G568 | 692.109  | AGp       |
| C569:G572 | 1279.164 | CUCGp     |
| U573:G575 | 998.134  | UAGp      |
| G576:G576 | 363.057  | Gp        |
| U577:G578 | 669.082  | UGp       |
| G579:G579 | 363.057  | Gp        |
| U580:G583 | 1281.132 | UUUGp     |
| U584:G586 | 974.123  | UCGp      |
| C587:G588 | 668.098  | CGp       |
| U589:G591 | 975.107  | UUGp      |

|           |          |             |
|-----------|----------|-------------|
| U592:G595 | 1280.148 | UUCGp       |
| U596:G597 | 669.082  | UGp         |
| A598:G607 | 3206.439 | AAAUCUCACGp |
| G608:G608 | 363.057  | Gp          |
| C609:G616 | 2549.318 | CUUAACUGp   |
| U617:G618 | 669.082  | UGp         |
| A619:G620 | 692.109  | AGp         |
| C621:G622 | 668.098  | CGp         |
| U623:G624 | 669.082  | UGp         |
| C625:G626 | 668.098  | CGp         |
| G627:G627 | 363.057  | Gp          |
| G628:G628 | 363.057  | Gp          |
| C629:G630 | 668.098  | CGp         |
| A631:G635 | 1632.227 | AUACGp      |
| G636:G636 | 363.057  | Gp          |
| G637:G637 | 363.057  | Gp          |
| C638:G640 | 997.15   | CAGp        |
| A641:G645 | 1632.227 | ACUAGp      |
| A646:G647 | 692.109  | AGp         |
| U648:G652 | 1609.2   | UACUGp      |
| C653:G655 | 997.15   | CAGp        |
| G656:G656 | 363.057  | Gp          |
| G657:G657 | 363.057  | Gp          |
| G658:G658 | 363.057  | Gp          |

|           |          |          |
|-----------|----------|----------|
| A659:G660 | 692.109  | AGp      |
| A661:G664 | 1303.175 | ACUGp    |
| G665:G665 | 363.057  | Gp       |
| A666:G673 | 2549.318 | AAUUCUGp |
| G674:G674 | 363.057  | Gp       |
| U675:G676 | 669.082  | UGp      |
| U677:G679 | 998.134  | UAGp     |
| C680:G681 | 668.098  | CGp      |
| G682:G682 | 363.057  | Gp       |
| U683:G684 | 669.082  | UGp      |
| G685:G685 | 363.057  | Gp       |
| A686:G689 | 1327.186 | AAUGp    |
| C690:G691 | 668.098  | CGp      |
| C692:G694 | 997.15   | CAGp     |
| A695:G701 | 2267.305 | AUAUCAGp |
| G702:G702 | 363.057  | Gp       |
| A703:G704 | 692.109  | AGp      |
| G705:G705 | 363.057  | Gp       |
| A706:G712 | 2265.337 | AACACCGp |
| G713:G713 | 363.057  | Gp       |
| U714:G715 | 669.082  | UGp      |
| G716:G716 | 363.057  | Gp       |
| C717:G718 | 668.098  | CGp      |
| A719:G721 | 1021.161 | AAGp     |

|           |          |         |
|-----------|----------|---------|
| G722:G722 | 363.057  | Gp      |
| C723:G724 | 668.098  | CGp     |
| G725:G725 | 363.057  | Gp      |
| G726:G726 | 363.057  | Gp      |
| U727:G732 | 1891.214 | UCUCUGp |
| G733:G733 | 363.057  | Gp      |
| G734:G734 | 363.057  | Gp      |
| C735:G737 | 997.15   | CAGp    |
| U738:G743 | 1938.252 | UAACUGp |
| A744:G746 | 997.15   | ACGp    |
| C747:G749 | 974.123  | CUGp    |
| A750:G751 | 692.109  | AGp     |
| G752:G752 | 363.057  | Gp      |
| A753:G754 | 692.109  | AGp     |
| C755:G756 | 668.098  | CGp     |
| A757:G760 | 1350.214 | AAAGp   |
| C761:G762 | 668.098  | CGp     |
| U763:G764 | 669.082  | UGp     |
| G765:G765 | 363.057  | Gp      |
| G766:G766 | 363.057  | Gp      |
| G767:G767 | 363.057  | Gp      |
| A768:G769 | 692.109  | AGp     |
| C770:G771 | 668.098  | CGp     |
| A772:G776 | 1655.255 | AACAGp  |

|           |          |               |
|-----------|----------|---------------|
| G777:G777 | 363.057  | Gp            |
| A778:G782 | 1633.211 | AUUAGp        |
| A783:G790 | 2548.334 | AUACCCUGp     |
| G791:G791 | 363.057  | Gp            |
| U792:G794 | 998.134  | UAGp          |
| U795:G800 | 1913.257 | UCCACGp       |
| C801:G803 | 973.139  | CCGp          |
| U804:G809 | 1961.28  | UAAACGp       |
| G810:G810 | 363.057  | Gp            |
| U811:G812 | 669.082  | UGp           |
| G813:G813 | 363.057  | Gp            |
| G814:G814 | 363.057  | Gp            |
| U815:G820 | 1938.252 | UACUAGp       |
| G821:G821 | 363.057  | Gp            |
| U822:G823 | 669.082  | UGp           |
| U824:G825 | 669.082  | UGp           |
| G826:G826 | 363.057  | Gp            |
| G827:G827 | 363.057  | Gp            |
| U828:G839 | 3725.396 | UUUCCUUCCUUGp |
| G840:G840 | 363.057  | Gp            |
| G841:G841 | 363.057  | Gp            |
| A842:G846 | 1608.216 | AUCCGp        |
| U847:G848 | 669.082  | UGp           |
| C849:G851 | 973.139  | CCGp          |

|           |          |               |
|-----------|----------|---------------|
| U852:G854 | 998.134  | UAGp          |
| C855:G860 | 1937.268 | CUAACGp       |
| C861:G867 | 2267.305 | CAUUAAGp      |
| U868:G874 | 2218.298 | UACCCCGp      |
| C875:G878 | 1279.164 | CCUGp         |
| G879:G879 | 363.057  | Gp            |
| G880:G880 | 363.057  | Gp            |
| G881:G881 | 363.057  | Gp            |
| A882:G883 | 692.109  | AGp           |
| U884:G887 | 1303.175 | UACGp         |
| G888:G888 | 363.057  | Gp            |
| C889:G891 | 973.139  | CCGp          |
| C892:G895 | 1326.202 | CAAGp         |
| G896:G896 | 363.057  | Gp            |
| C897:G909 | 4193.596 | CUAAAACUCAAGp |
| G910:G910 | 363.057  | Gp            |
| A911:G915 | 1633.211 | AAUUGp        |
| A916:G918 | 997.15   | ACGp          |
| G919:G919 | 363.057  | Gp            |
| G920:G920 | 363.057  | Gp            |
| G921:G921 | 363.057  | Gp            |
| G922:G922 | 363.057  | Gp            |
| C923:G926 | 1278.18  | CCCGp         |
| C927:G932 | 1960.296 | CACAAGp       |

|             |          |              |
|-------------|----------|--------------|
| C933:G934   | 668.098  | CGp          |
| G935:G935   | 363.057  | Gp           |
| C936:G937   | 668.098  | CGp          |
| G938:G938   | 363.057  | Gp           |
| A939:G940   | 692.109  | AGp          |
| C941:G944   | 1303.175 | CAUGp        |
| U945:G946   | 669.082  | UGp          |
| G947:G947   | 363.057  | Gp           |
| A948:G956   | 2879.355 | AUUAAUUCGp   |
| A957:G959   | 998.134  | AUGp         |
| C960:G964   | 1631.243 | CAACGp       |
| C965:G966   | 668.098  | CGp          |
| A967:G969   | 1021.161 | AAGp         |
| A970:G980   | 3488.453 | AACCUUACCUGp |
| G981:G981   | 363.057  | Gp           |
| G982:G982   | 363.057  | Gp           |
| U983:G986   | 1281.132 | UUUGp        |
| A987:G991   | 1632.227 | ACAUGp       |
| C992:G996   | 1631.243 | CACAGp       |
| G997:G997   | 363.057  | Gp           |
| A998:G1000  | 997.15   | ACGp         |
| C1001:G1002 | 668.098  | CGp          |
| U1003:G1007 | 1609.2   | UCUAGp       |
| A1008:G1009 | 692.109  | AGp          |



|             |          |           |
|-------------|----------|-----------|
| A1010:G1013 | 1327.186 | AUAGp     |
| G1014:G1014 | 363.057  | Gp        |
| C1015:G1016 | 668.098  | CGp       |
| U1017:G1024 | 2502.28  | UUCCCUUGp |
| U1025:G1026 | 669.082  | UGp       |
| G1027:G1027 | 363.057  | Gp        |
| C1028:G1031 | 1279.164 | CCUGp     |
| U1032:G1033 | 669.082  | UGp       |
| U1034:G1035 | 669.082  | UGp       |
| C1036:G1038 | 997.15   | CAGp      |
| G1039:G1039 | 363.057  | Gp        |
| U1040:G1041 | 669.082  | UGp       |
| G1042:G1042 | 363.057  | Gp        |
| U1043:G1044 | 669.082  | UGp       |
| C1045:G1048 | 1303.175 | CAUGp     |
| G1049:G1049 | 363.057  | Gp        |
| C1050:G1052 | 974.123  | CUGp      |
| U1053:G1055 | 974.123  | UCGp      |
| U1056:G1059 | 1303.175 | UCAGp     |
| C1060:G1063 | 1279.164 | CUCGp     |
| U1064:G1065 | 669.082  | UGp       |
| U1066:G1068 | 974.123  | UCGp      |
| U1069:G1070 | 669.082  | UGp       |
| A1071:G1072 | 692.109  | AGp       |

|             |          |            |
|-------------|----------|------------|
| A1073:G1075 | 998.134  | AUGp       |
| U1076:G1078 | 975.107  | UUGp       |
| G1079:G1079 | 363.057  | Gp         |
| G1080:G1080 | 363.057  | Gp         |
| U1081:G1085 | 1633.211 | UUAAGp     |
| U1086:G1090 | 1584.205 | UCCCGp     |
| C1091:G1095 | 1631.243 | CAACGp     |
| A1096:G1097 | 692.109  | AGp        |
| C1098:G1099 | 668.098  | CGp        |
| C1100:G1108 | 2853.375 | CAACCCUUGp |
| U1109:G1115 | 2220.266 | UCUCAUGp   |
| U1116:G1118 | 975.107  | UUGp       |
| C1119:G1122 | 1302.191 | CCAGp      |
| C1123:G1126 | 1302.191 | CACGp      |
| U1127:G1131 | 1633.211 | UAAUGp     |
| G1132:G1132 | 363.057  | Gp         |
| U1133:G1134 | 669.082  | UGp        |
| G1135:G1135 | 363.057  | Gp         |
| G1136:G1136 | 363.057  | Gp         |
| G1137:G1137 | 363.057  | Gp         |
| A1138:G1142 | 1608.216 | ACUCGp     |
| U1143:G1144 | 669.082  | UGp        |
| A1145:G1146 | 692.109  | AGp        |
| A1147:G1148 | 692.109  | AGp        |

|             |          |              |
|-------------|----------|--------------|
| A1149:G1152 | 1303.175 | ACUGp        |
| C1153:G1155 | 973.139  | CCGp         |
| G1156:G1156 | 363.057  | Gp           |
| G1157:G1157 | 363.057  | Gp           |
| G1158:G1158 | 363.057  | Gp           |
| U1159:G1166 | 2548.334 | UCAACUCGp    |
| G1167:G1167 | 363.057  | Gp           |
| A1168:G1169 | 692.109  | AGp          |
| G1170:G1170 | 363.057  | Gp           |
| A1171:G1173 | 1021.161 | AAGp         |
| G1174:G1174 | 363.057  | Gp           |
| U1175:G1176 | 669.082  | UGp          |
| G1177:G1177 | 363.057  | Gp           |
| G1178:G1178 | 363.057  | Gp           |
| G1179:G1179 | 363.057  | Gp           |
| A1180:G1182 | 998.134  | AUGp         |
| A1183:G1185 | 997.15   | ACGp         |
| U1186:G1190 | 1632.227 | UCAAGp       |
| U1191:G1198 | 2549.318 | UCAUCAUGp    |
| C1199:G1207 | 2830.348 | CCCCUUAUGp   |
| U1208:G1212 | 1608.216 | UCCAGp       |
| G1213:G1213 | 363.057  | Gp           |
| G1214:G1214 | 363.057  | Gp           |
| C1215:G1225 | 3488.453 | CUUCACACAUGp |

|             |          |               |
|-------------|----------|---------------|
| C1226:G1233 | 2572.346 | CUACAAUGp     |
| G1234:G1234 | 363.057  | Gp            |
| C1235:G1237 | 973.139  | CCGp          |
| G1238:G1238 | 363.057  | Gp            |
| U1239:G1245 | 2290.332 | UACAAAGp      |
| G1246:G1246 | 363.057  | Gp            |
| G1247:G1247 | 363.057  | Gp            |
| C1248:G1250 | 974.123  | CUGp          |
| C1251:G1252 | 668.098  | CGp           |
| A1253:G1255 | 998.134  | AUGp          |
| C1256:G1258 | 973.139  | CCGp          |
| C1259:G1260 | 668.098  | CGp           |
| A1261:G1262 | 692.109  | AGp           |
| G1263:G1263 | 363.057  | Gp            |
| U1264:G1268 | 1633.211 | UUAAGp        |
| C1269:G1270 | 668.098  | CGp           |
| A1271:G1282 | 3865.527 | AAUCCUUAAAAGp |
| C1283:G1285 | 973.139  | CCGp          |
| G1286:G1286 | 363.057  | Gp            |
| U1287:G1292 | 1914.241 | UCUCAGp       |
| U1293:G1296 | 1280.148 | UUCGp         |
| G1297:G1297 | 363.057  | Gp            |
| A1298:G1301 | 1303.175 | AUCGp         |
| G1302:G1302 | 363.057  | Gp            |

|             |          |          |
|-------------|----------|----------|
| G1303:G1303 | 363.057  | Gp       |
| G1304:G1304 | 363.057  | Gp       |
| U1305:G1308 | 1280.148 | UCUGp    |
| C1309:G1315 | 2242.309 | CAACUCGp |
| A1316:G1321 | 1912.273 | ACCCCGp  |
| U1322:G1323 | 669.082  | UGp      |
| A1324:G1326 | 1021.161 | AAGp     |
| U1327:G1329 | 974.123  | UCGp     |
| G1330:G1330 | 363.057  | Gp       |
| A1331:G1332 | 692.109  | AGp      |
| U1333:G1335 | 974.123  | UCGp     |
| C1336:G1339 | 1303.175 | CUAGp    |
| U1340:G1345 | 1938.252 | UAAUCGp  |
| C1346:G1348 | 997.15   | CAGp     |
| A1349:G1353 | 1632.227 | AUCAGp   |
| C1354:G1358 | 1631.243 | CAACGp   |
| C1359:G1361 | 974.123  | CUGp     |
| C1362:G1363 | 668.098  | CGp      |
| G1364:G1364 | 363.057  | Gp       |
| U1365:G1366 | 669.082  | UGp      |
| A1367:G1372 | 1961.28  | AAUACGp  |
| U1373:G1378 | 1890.23  | UUCCCGp  |
| G1379:G1379 | 363.057  | Gp       |
| G1380:G1380 | 363.057  | Gp       |

|             |          |              |
|-------------|----------|--------------|
| C1381:G1385 | 1585.189 | CCUUGp       |
| U1386:G1394 | 2876.403 | UACACACCGp   |
| C1395:G1398 | 1278.18  | CCCGp        |
| U1399:G1403 | 1608.216 | UCACGp       |
| U1404:G1408 | 1609.2   | UCAUGp       |
| A1409:G1412 | 1350.214 | AAAGp        |
| U1413:G1415 | 974.123  | UCGp         |
| G1416:G1416 | 363.057  | Gp           |
| U1417:G1425 | 2876.403 | UAACACCCGp   |
| A1426:G1428 | 1021.161 | AAGp         |
| C1429:G1432 | 1302.191 | CCAGp        |
| U1433:G1434 | 669.082  | UGp          |
| G1435:G1435 | 363.057  | Gp           |
| C1436:G1446 | 3463.457 | CCUAACCCUCGp |
| G1447:G1447 | 363.057  | Gp           |
| G1448:G1448 | 363.057  | Gp           |
| A1449:G1450 | 692.109  | AGp          |
| G1451:G1451 | 363.057  | Gp           |
| G1452:G1452 | 363.057  | Gp           |
| A1453:G1454 | 692.109  | AGp          |
| C1455:G1457 | 974.123  | CUGp         |
| U1458:G1460 | 974.123  | UCGp         |
| A1461:G1463 | 1021.161 | AAGp         |
| G1464:G1464 | 363.057  | Gp           |

|             |          |          |
|-------------|----------|----------|
| U1465:G1466 | 669.082  | UGp      |
| G1467:G1467 | 363.057  | Gp       |
| G1468:G1468 | 363.057  | Gp       |
| A1469:G1472 | 1303.175 | AUCGp    |
| G1473:G1473 | 363.057  | Gp       |
| C1474:G1475 | 668.098  | CGp      |
| A1476:G1479 | 1304.159 | AUUGp    |
| G1480:G1480 | 363.057  | Gp       |
| G1481:G1481 | 363.057  | Gp       |
| A1482:G1484 | 997.15   | ACGp     |
| A1485:G1487 | 1021.161 | AAGp     |
| U1488:G1490 | 974.123  | UCGp     |
| U1491:G1497 | 2290.332 | UAACAAGp |
| G1498:G1498 | 363.057  | Gp       |
| U1499:G1501 | 998.134  | UAGp     |
| C1502:G1504 | 973.139  | CCGp     |
| U1505:G1509 | 1608.216 | UACCGp   |
| G1510:G1510 | 363.057  | Gp       |
| A1511:G1513 | 1021.161 | AAGp     |
| G1514:G1514 | 363.057  | Gp       |
| U1515:G1516 | 669.082  | UGp      |
| C1517:G1518 | 668.098  | CGp      |
| G1519:G1519 | 363.057  | Gp       |
| C1520:G1522 | 974.123  | CUGp     |

|             |          |                |
|-------------|----------|----------------|
| G1523:G1523 | 363.057  | Gp             |
| A1524:U1537 | 4262.544 | AUCACCUCCUUUCU |
